# Supplementary material for: Sequential and simultaneous ion transfer into carbon nanopores during charge–discharge cycles in electrical double layer capacitors
Source: Royal Society of Chemistry journal article supplement (doi:10.1039/d1se01975a), 2022-01-01
Supplement: d1se01975a1.pdf [file d1se01975a1.pdf]

## Supporting Information

# Sequential and Simultaneous Ion Transfer into Carbon Nanopores during Charge–Discharge Cycles in Electrical Double-layer Capacitors

*Hiroki Takamatsu,<sup>†</sup> Md Sharif Khan,<sup>†</sup> Takuya Araki,<sup>‡</sup> Chiharu Urita,<sup>‡</sup> Koki Urita,<sup>‡</sup> and Tomonori Ohba<sup>†,\*</sup>*

<sup>†</sup> Graduate School of Science, Chiba University, 1-33 Yayoi, Inage, Chiba 263-8522, Japan

<sup>‡</sup> Graduate School of Engineering, Nagasaki University, 1-14 Bunkyo, Nagasaki 852-8521, Japan

\* E-mail: ohba@chiba-u.jp

Table S1–S3

Figure S1–S23

**Table S1.** Unit cell size of each system.

| System        | $L_x$ / nm | $L_y$ / nm | $L_z$ / nm |
|---------------|------------|------------|------------|
| 0.98 nm wedge | 5.18       | 5.10       | 14.51      |
| 1.5 nm wedge  | 5.13       | 5.10       | 14.42      |
| 2.3 nm wedge  | 5.26       | 5.10       | 14.45      |
| 2.9 nm wedge  | 5.12       | 5.10       | 14.48      |
| 3.4 nm wedge  | 5.19       | 5.10       | 14.45      |
| 1.7 nm slit   | 5.18       | 5.10       | 14.51      |
| 2.5 nm slit   | 5.18       | 5.10       | 14.51      |
| 3.2 nm slit   | 5.67       | 5.10       | 14.51      |
| 4.9 nm slit   | 7.39       | 5.10       | 14.51      |
| Bulk          | 5.00       | 5.00       | 5.00       |

**Table S2.** The number of molecular species.

| System        | Lithium ion | Perchlorate ion | PC   |
|---------------|-------------|-----------------|------|
| 0.98 nm wedge | 85          | 85              | 879  |
| 1.5 nm wedge  | 99          | 99              | 1070 |
| 2.3 nm wedge  | 124         | 124             | 1358 |
| 2.9 nm wedge  | 135         | 135             | 1508 |
| 3.4 nm wedge  | 149         | 149             | 1654 |
| 1.7 nm slit   | 107         | 107             | 1178 |
| 2.5 nm slit   | 131         | 131             | 1441 |
| 3.2 nm slit   | 160         | 160             | 1776 |
| 4.9 nm slit   | 236         | 236             | 2610 |
| Bulk          | 75          | 75              | 810  |

**Table S3.** Simulation parameters.

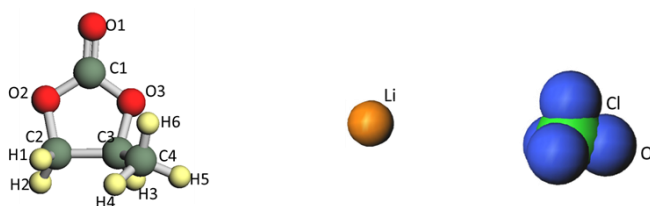

**Lennard-Jones parameters and charges**

| Atom        | $\epsilon / \text{kJ mol}^{-1}$ | $\sigma / \text{nm}$ | $q / e$ |
|-------------|---------------------------------|----------------------|---------|
| C1          | 0.36                            | 0.34                 | +0.8467 |
| O1          | 0.88                            | 0.30                 | -0.5525 |
| O2          | 0.71                            | 0.30                 | -0.4059 |
| O3          | 0.71                            | 0.30                 | -0.4069 |
| C2          | 0.46                            | 0.34                 | +0.0964 |
| C3          | 0.46                            | 0.34                 | +0.1121 |
| C4          | 0.46                            | 0.34                 | -0.1111 |
| H1, H2      | 0.066                           | 0.25                 | +0.0797 |
| H3          | 0.066                           | 0.25                 | +0.0857 |
| H4, H5, H6  | 0.066                           | 0.26                 | +0.0587 |
| Li          | 0.69                            | 0.15                 | +1.0000 |
| Cl          | 1.1                             | 0.35                 | +1.0120 |
| O           | 0.88                            | 0.30                 | -0.5030 |
| Pore carbon | 0.36                            | 0.34                 | -       |

**Improper coefficients**

| Improper    | $K_{\text{improper}} / \text{kJ}$ | n | d  |
|-------------|-----------------------------------|---|----|
| O3-C1-O2-O1 | 43.9                              | 2 | -1 |

**Bond coefficients**

| Bond  | $K_{\text{bond}} / 10^3 \text{ kJ nm}^{-2}$ | $r / \text{nm}$ |
|-------|---------------------------------------------|-----------------|
| C1-O1 | 271                                         | 0.1214          |
| C1-O2 | 172                                         | 0.1343          |
| C1-O3 | 172                                         | 0.1343          |
| O2-C2 | 126                                         | 0.1439          |
| O3-C3 | 126                                         | 0.1439          |
| C2-C3 | 127                                         | 0.1535          |
| C2-H1 | 140                                         | 0.1093          |
| C2-H2 | 140                                         | 0.1093          |
| C3-H3 | 140                                         | 0.1093          |
| C3-C4 | 127                                         | 0.1535          |
| C4-H4 | 141                                         | 0.1092          |
| C4-H5 | 141                                         | 0.1092          |
| C4-H6 | 141                                         | 0.1092          |
| Cl-O  | 233                                         | 0.1483          |

**Angle coefficients**

| Angle    | $K_{\text{angle}} / \text{kJ radian}^2$ | $\Theta / \text{degrees}$ |
|----------|-----------------------------------------|---------------------------|
| C1-O2-C2 | 266                                     | 115.14                    |
| C1-O3-C3 | 266                                     | 115.14                    |
| O1-C1-O2 | 317                                     | 123.33                    |
| O1-C1-O3 | 317                                     | 123.33                    |
| O2-C1-O3 | 319                                     | 111.38                    |
| O2-C2-C3 | 283                                     | 108.42                    |
| O2-C2-H1 | 212                                     | 108.82                    |
| O2-C2-H2 | 212                                     | 108.82                    |
| O3-C3-C2 | 283                                     | 108.42                    |
| O3-C3-H3 | 212                                     | 108.82                    |
| O3-C3-C4 | 283                                     | 108.42                    |
| C2-C3-H3 | 193                                     | 110.07                    |
| C2-C3-C4 | 264                                     | 110.63                    |
| C3-C2-H1 | 194                                     | 110.07                    |
| C3-C2-H2 | 194                                     | 110.07                    |
| C3-C4-H4 | 194                                     | 110.05                    |
| C3-C4-H5 | 194                                     | 110.05                    |
| C3-C4-H6 | 194                                     | 110.05                    |
| H3-C3-C4 | 194                                     | 110.07                    |
| H1-C2-H2 | 164                                     | 109.55                    |
| H4-C4-H5 | 165                                     | 108.35                    |
| H4-C4-H6 | 165                                     | 108.35                    |
| H5-C4-H6 | 165                                     | 108.35                    |
| O-Cl-O   | 586                                     | 109.47                    |

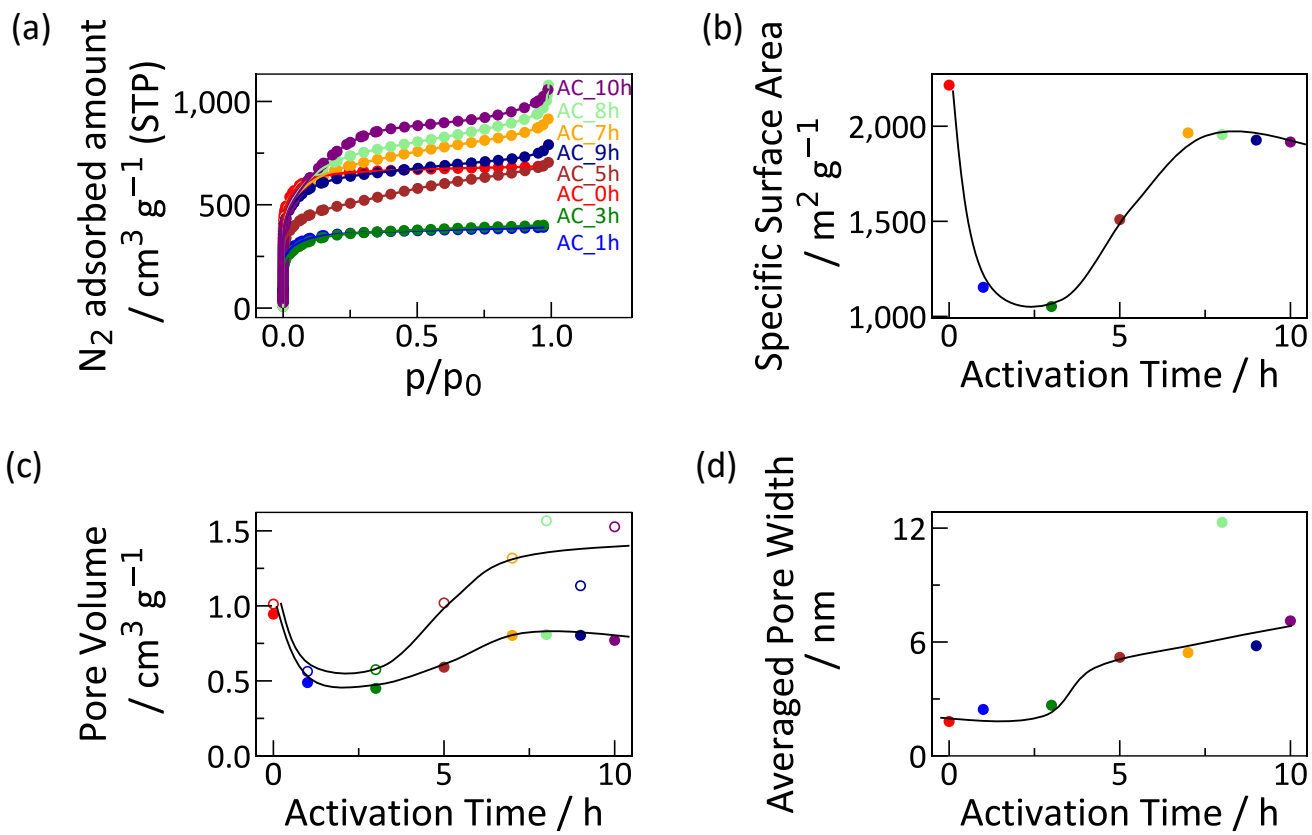

**Figure S1.** Pore structure evaluation of activated carbons by N<sub>2</sub> adsorption isotherms at 77 K (a). Specific surface area (b), micropore and total pore volumes (c), and averaged pore width (d) as a function of activation time of carbon samples. Filled and open symbols, respectively, depicted micropore, and total pore volumes.

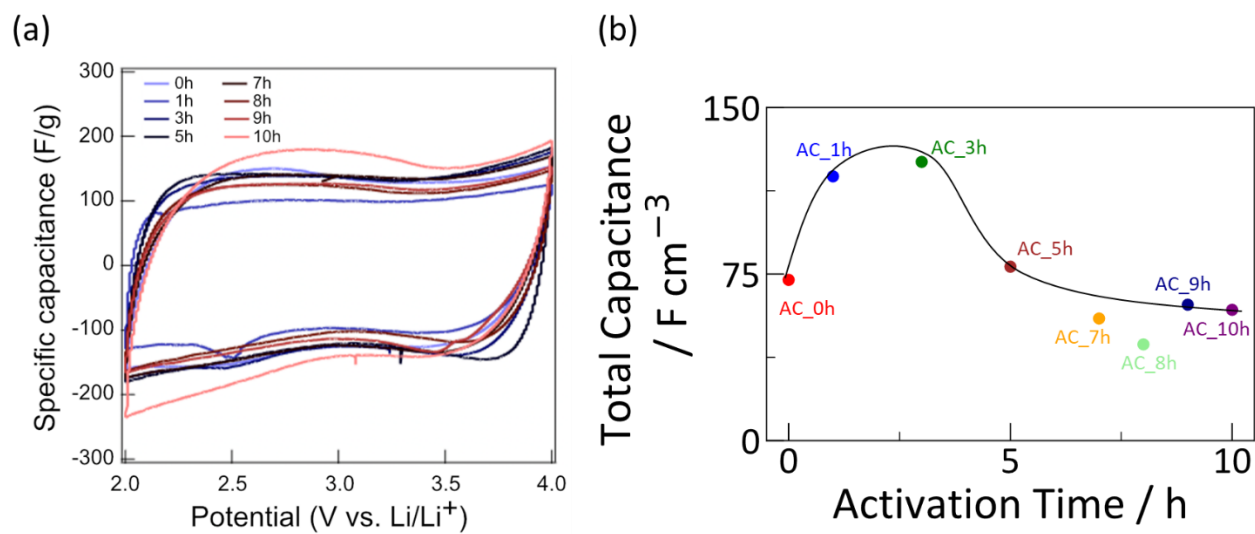

**Figure S2.** Capacitance dependence on activation time. (a) CV curves. (b) Total capacitance normalized by the total pore volume of ACs determined from N<sub>2</sub> adsorption isotherm.

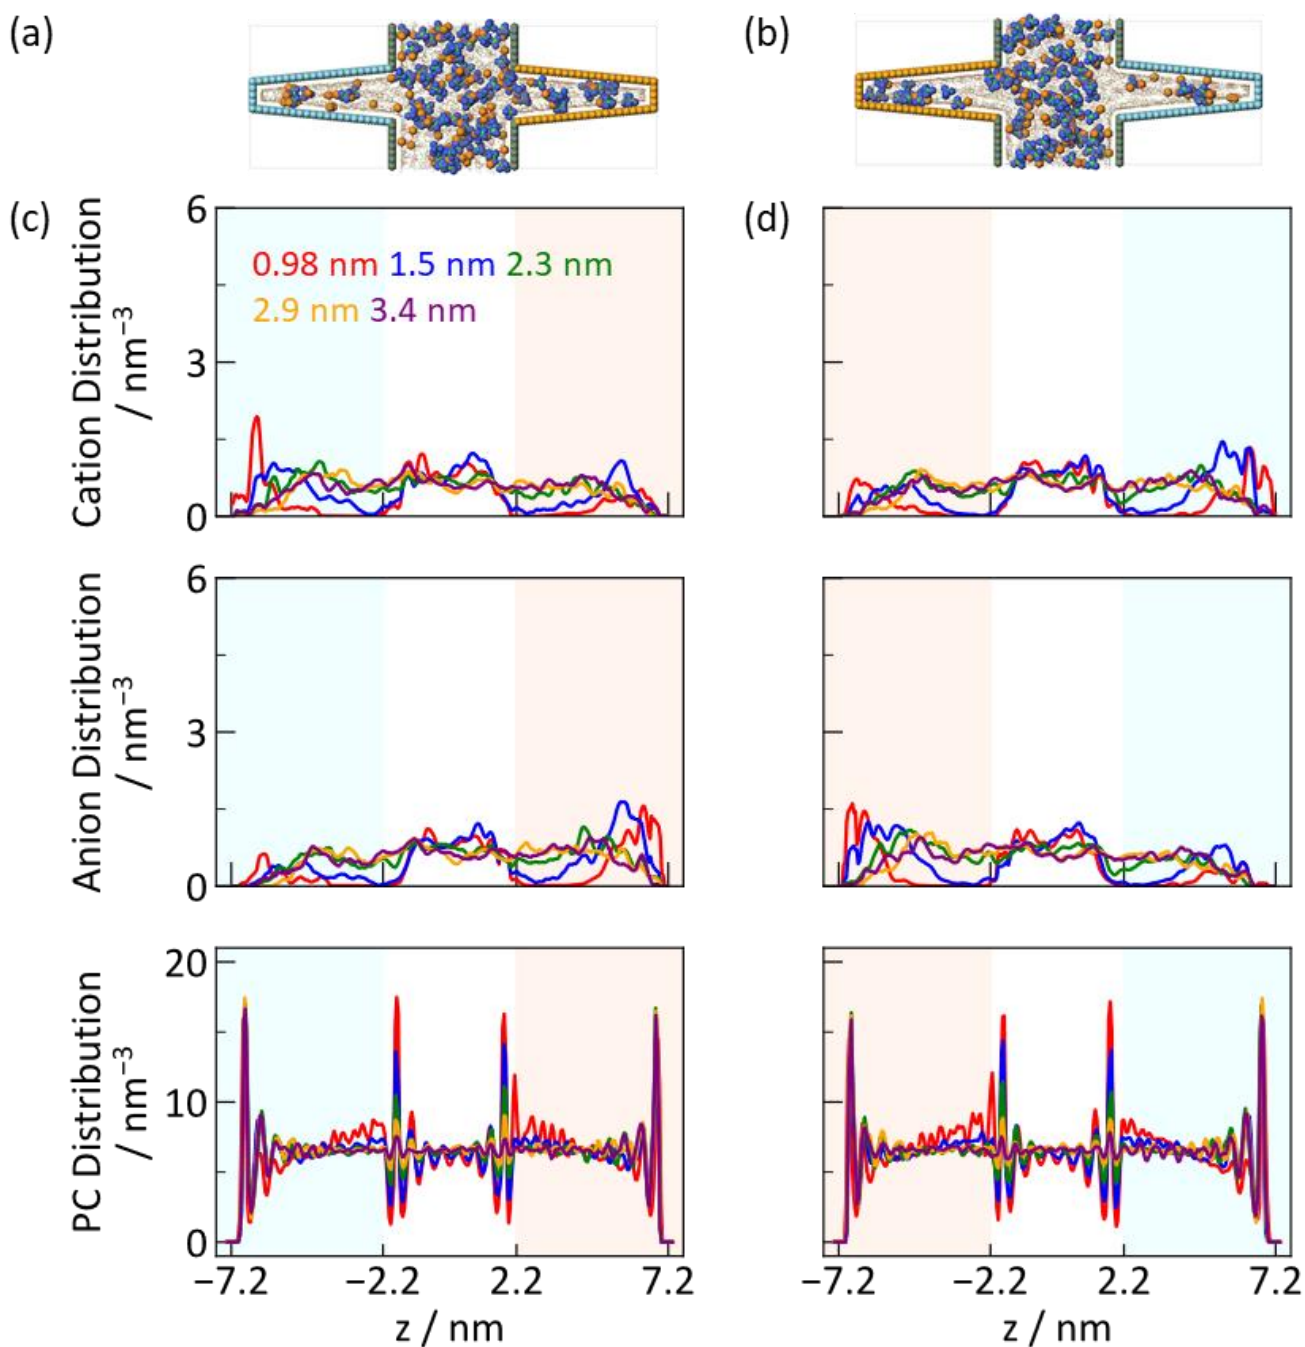

**Figure S3.** Snapshots of ions in wedge-shaped pores with a positive charge ( $+0.01 e$ ) on the right side carbons and negative charge ( $-0.01 e$ ) on left side carbons (a), and negative charges on the right side carbons and positive charges on left side carbons (b) applying charges of  $\pm 0.01 e$  in the wedge-shaped pores with the averaged pore size of 0.98, 1.5, 2.3, 2.9, and 3.4 nm. Orange and blue spheres, gray ball-and-stick represent  $\text{Li}^+$  and  $\text{ClO}_4^-$  ions, and PC, respectively. (c, d) Cationic (top), anionic (middle), and PC (bottom) distributions against  $z$ -direction in the partial condition of (a) and (b), respectively.

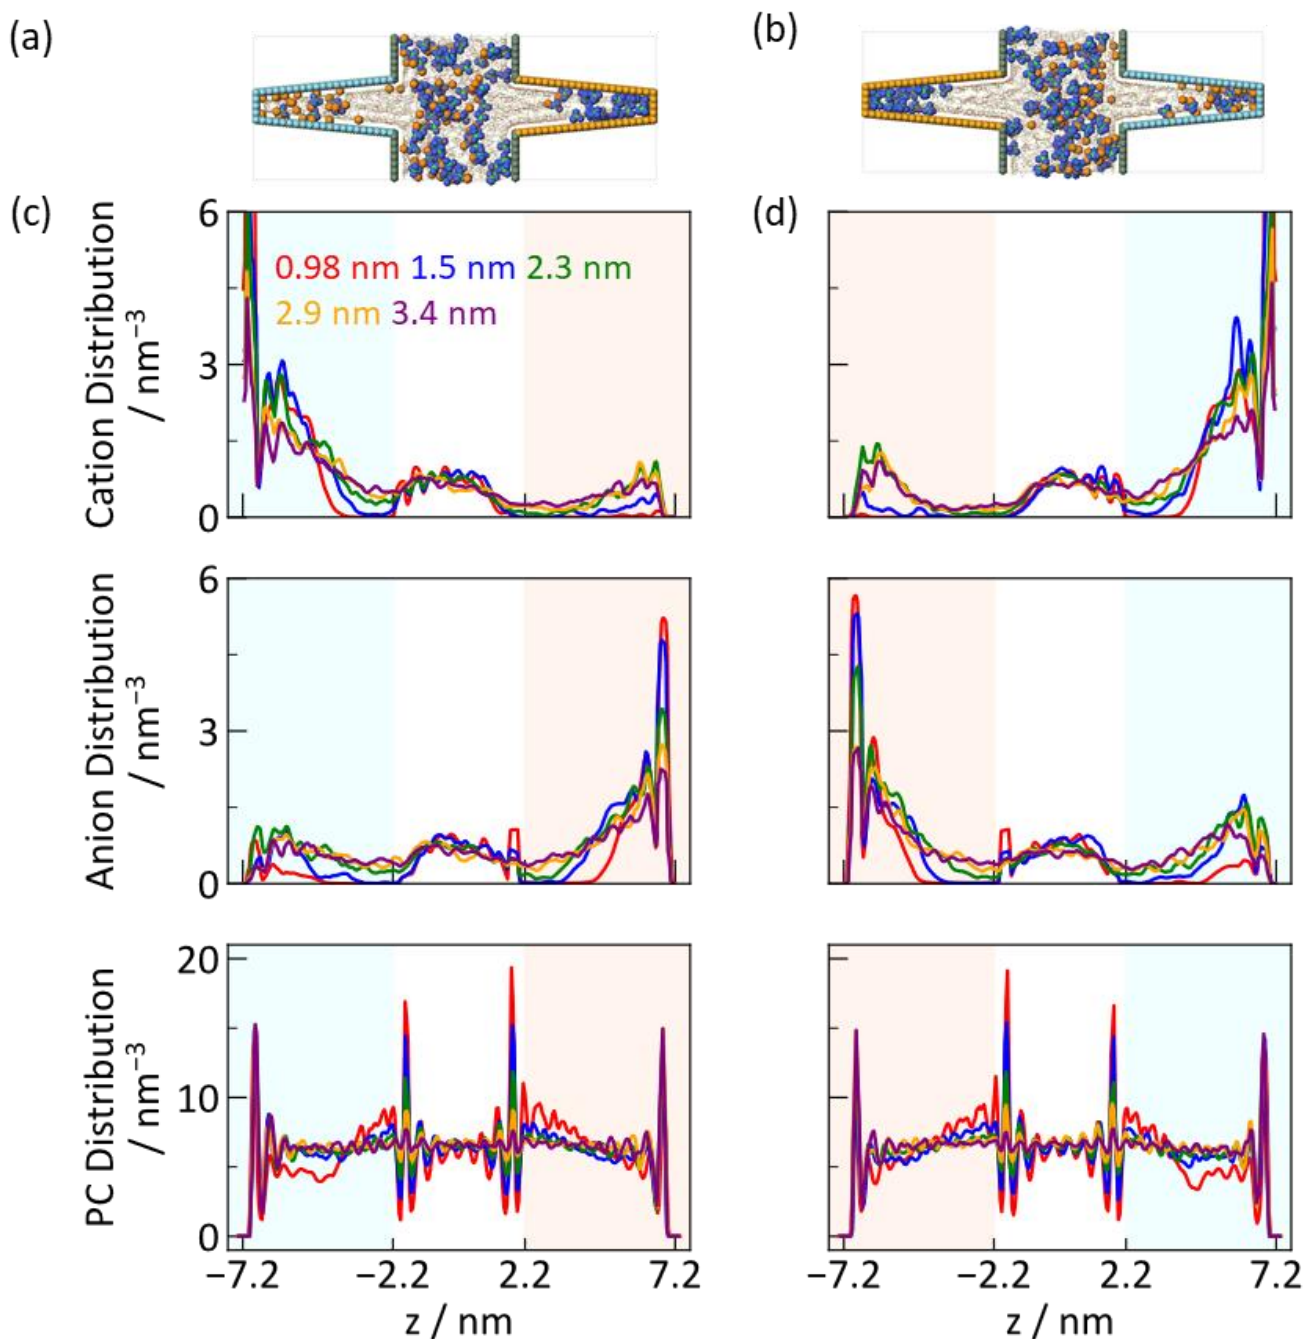

**Figure S4.** Snapshots of ions in wedge-shaped pores with a positive charge ( $+0.02 e$ ) on the right side carbons and negative charge ( $-0.02 e$ ) on left side carbons (a), and negative charges on the right side carbons and positive charges on left side carbons (b) applying charges of  $\pm 0.02 e$  in the wedge-shaped pores with the averaged pore size of 0.98, 1.5, 2.3, 2.9, and 3.4 nm. Orange and blue spheres, gray ball-and-stick represent  $\text{Li}^+$  and  $\text{ClO}_4^-$  ions, and PC, respectively. (c, d) Cationic (top), anionic (middle), and PC (bottom) distributions against  $z$ -direction in the partial condition of (a) and (b), respectively.

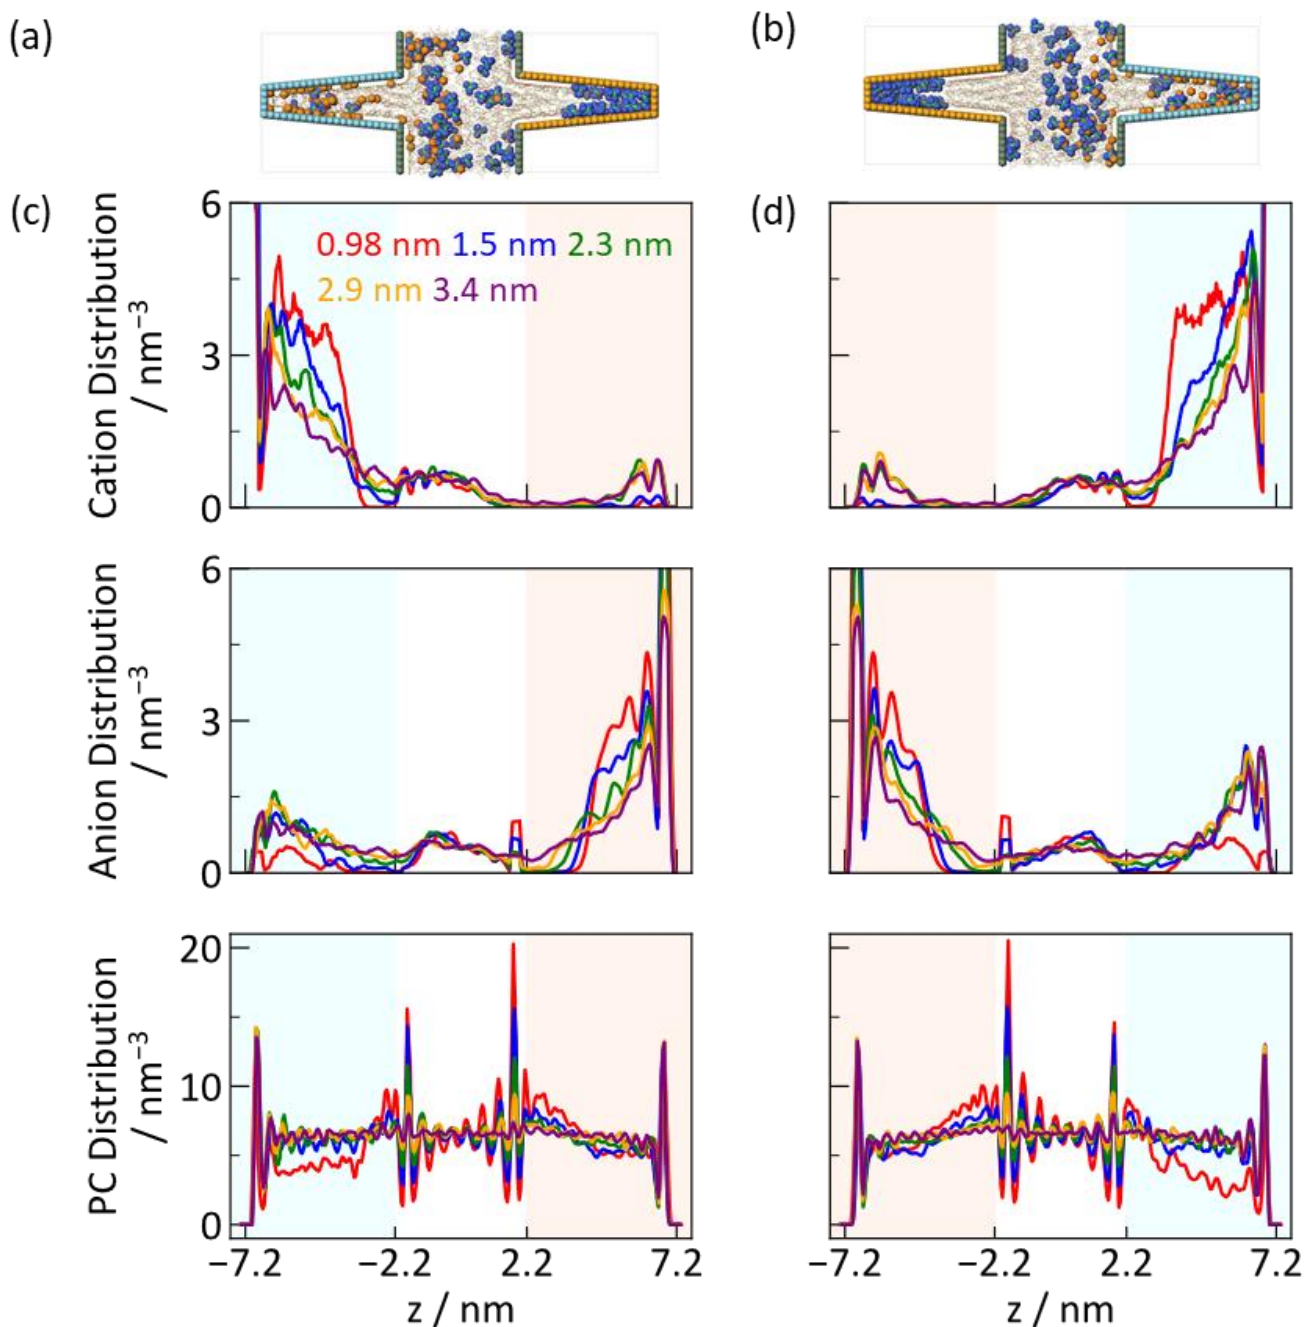

**Figure S5.** Snapshots of ions in wedge-shaped pores with a positive charge ( $+0.03 e$ ) on the right side carbons and negative charge ( $-0.03 e$ ) on left side carbons (a), and negative charges on the right side carbons and positive charges on left side carbons (b) applying charges of  $\pm 0.03 e$  in the wedge-shaped pores with the averaged pore size of 0.98, 1.5, 2.3, 2.9, and 3.4 nm. Orange and blue spheres, gray ball-and-stick represent  $\text{Li}^+$  and  $\text{ClO}_4^-$  ions, and PC, respectively. (c, d) Cationic (top), anionic (middle), and PC (bottom) distributions against  $z$ -direction in the partial condition of (a) and (b), respectively.



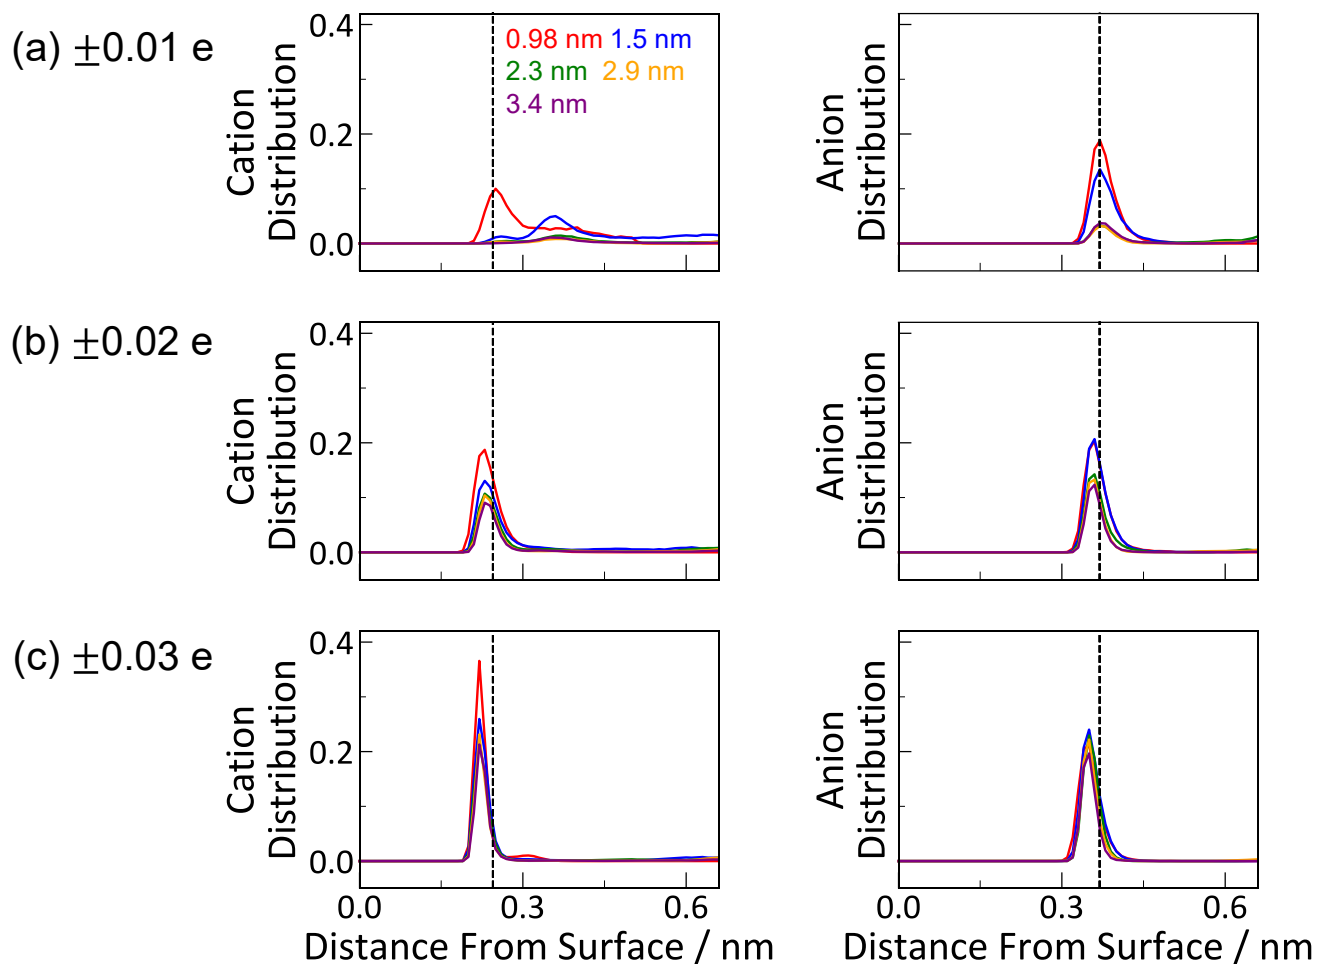

**Figure S6.** Distribution of distance between a cation and a carbon atom (left), and an anion and a carbon atom (right) under applying a charge of  $\pm 0.01 e$  (a),  $\pm 0.02 e$  (b), and  $\pm 0.03 e$  (c) in the wedge-shaped pores with the averaged pore size of 0.98, 1.5, 2.3, 2.9, and 3.4 nm. Collision distances are 0.26 and 0.37 nm for cation-carbon and anion-carbon, respectively, which are shown in the black dashed line.

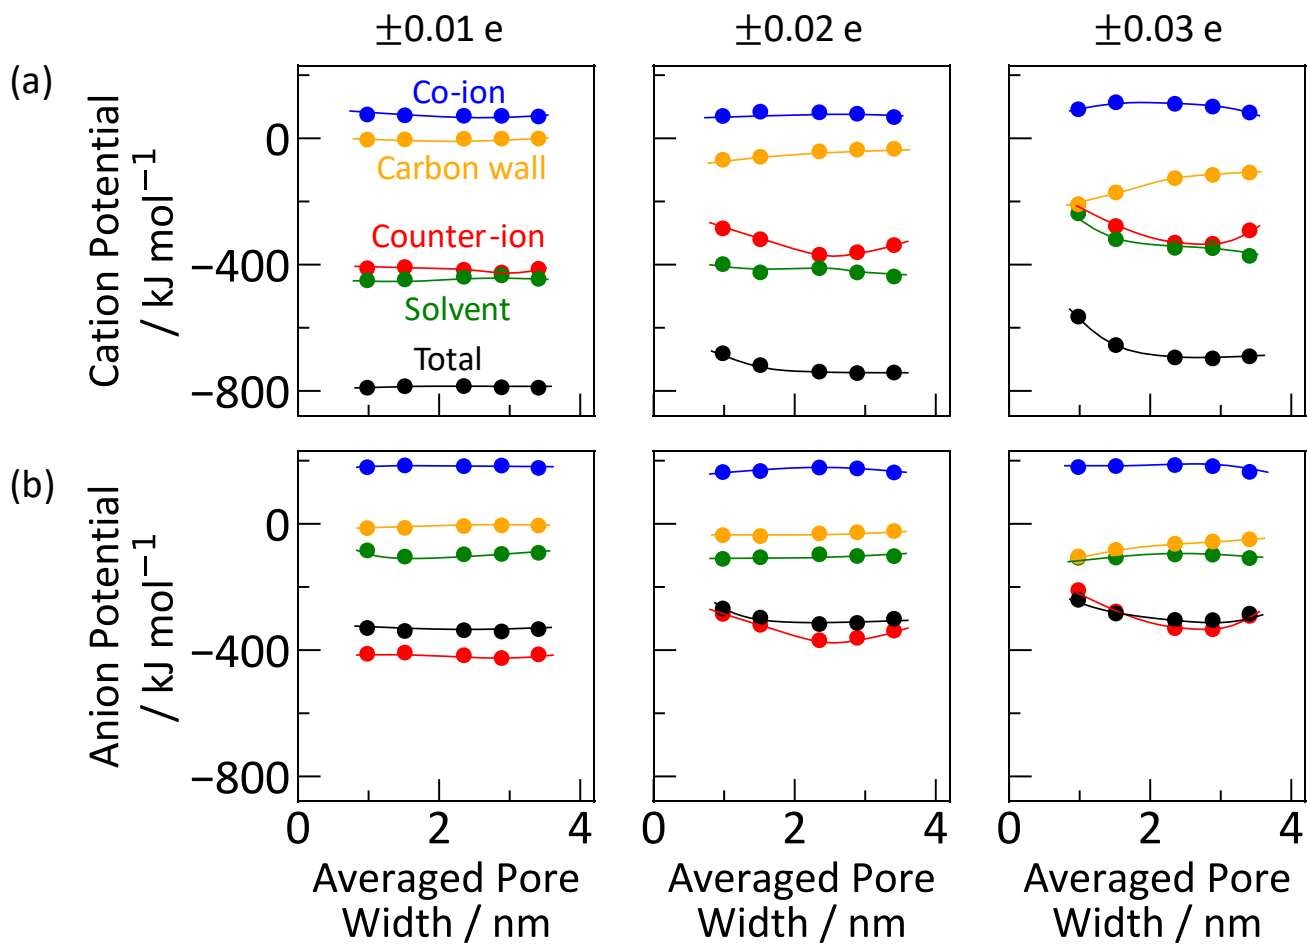

**Figure S7.** (a) Cation potential from co-ion, carbon wall, counter-ion, and solvent. (b) Anion potential from co-ion, carbon wall, counter-ion, and solvent.

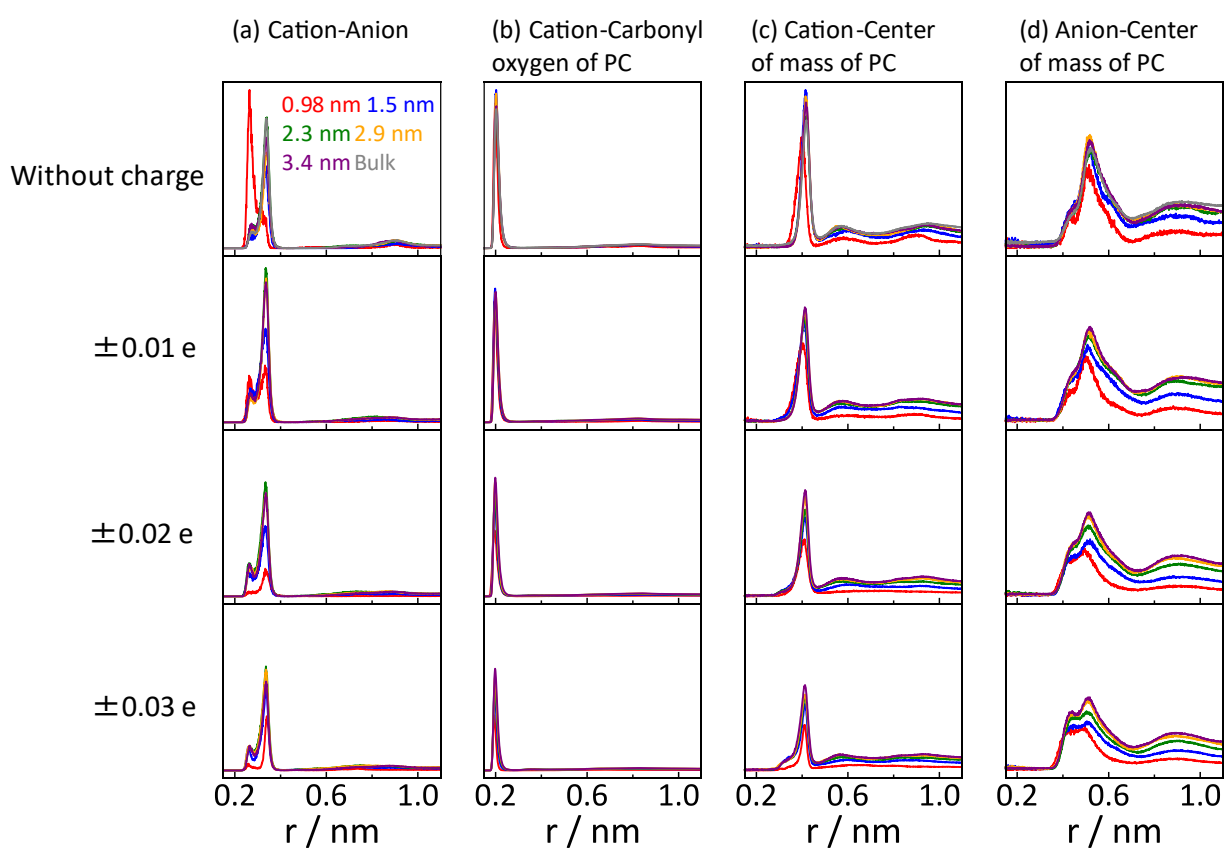

**Figure S8.** The radial distribution function of cation-anion (a), cation-carbonyl oxygen of PC (b), cation-center of mass of PC (c), and anion-PC (d) without charge (top), with  $\pm 0.01 e$  (second from top),  $\pm 0.02 e$  (second from bottom) and  $\pm 0.03 e$  (bottom) in the wedge-shaped pores with the averaged pore size of 0.98, 1.5, 2.3, 2.9, and 3.4 nm.

Hollow site

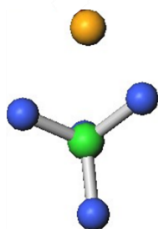

Top site

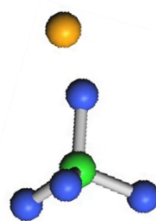

**Figure S9.** Snapshots of  $\text{Li}^+$  (orange) at the hollow site and the top site of  $\text{ClO}_4^-$ .

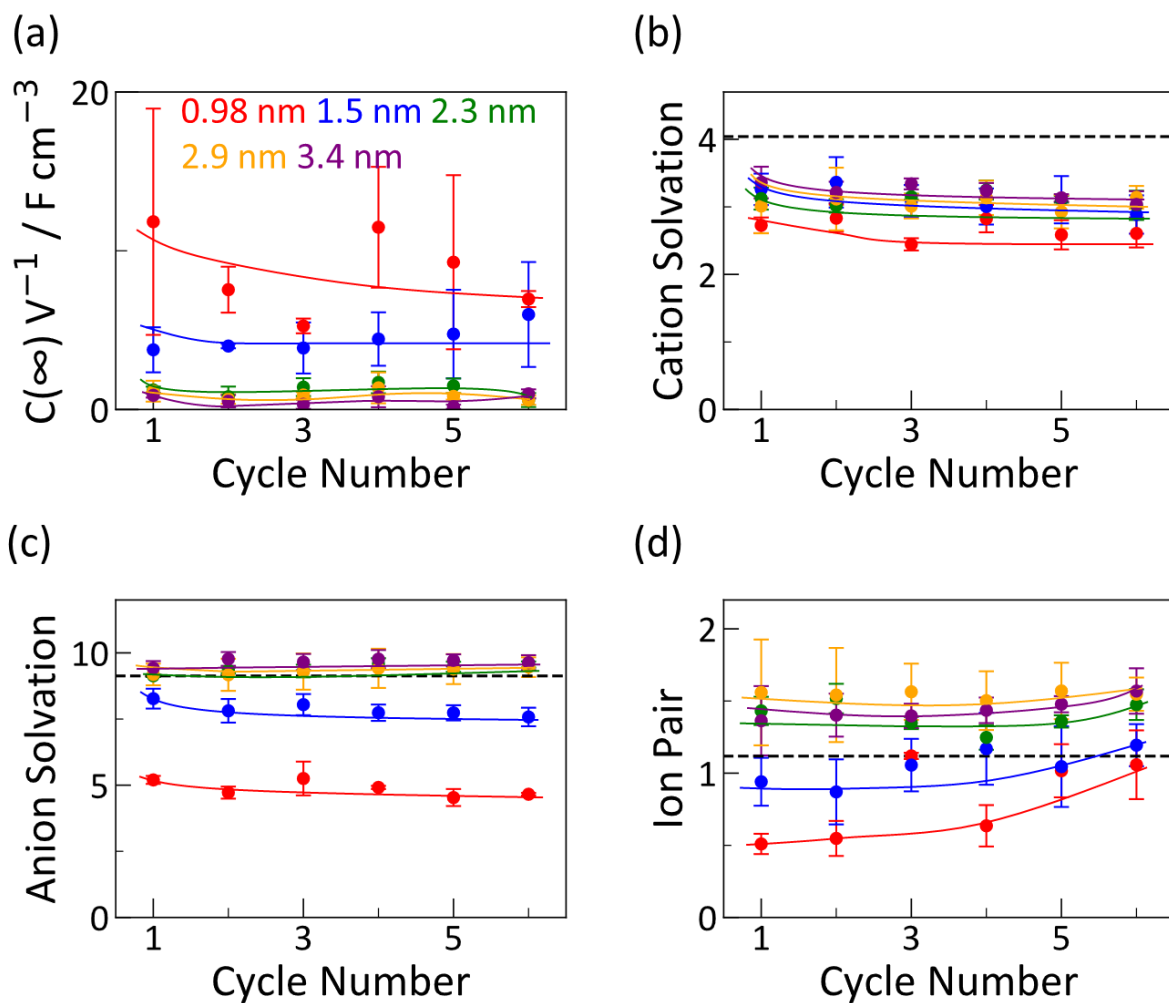

**Figure S10.** Cyclability for capacitance (a), cation solvation (b), anion solvation (c), and ion pair (d) under applying a charge of  $\pm 0.01 e$  in the wedge-shaped pores with the averaged pore size of 0.98, 1.5, 2.3, 2.9, and 3.4 nm. Ion pair and cation and anion solvations were calculated in the pores. Bulk solvation and ion pair numbers are shown in a black dashed line.

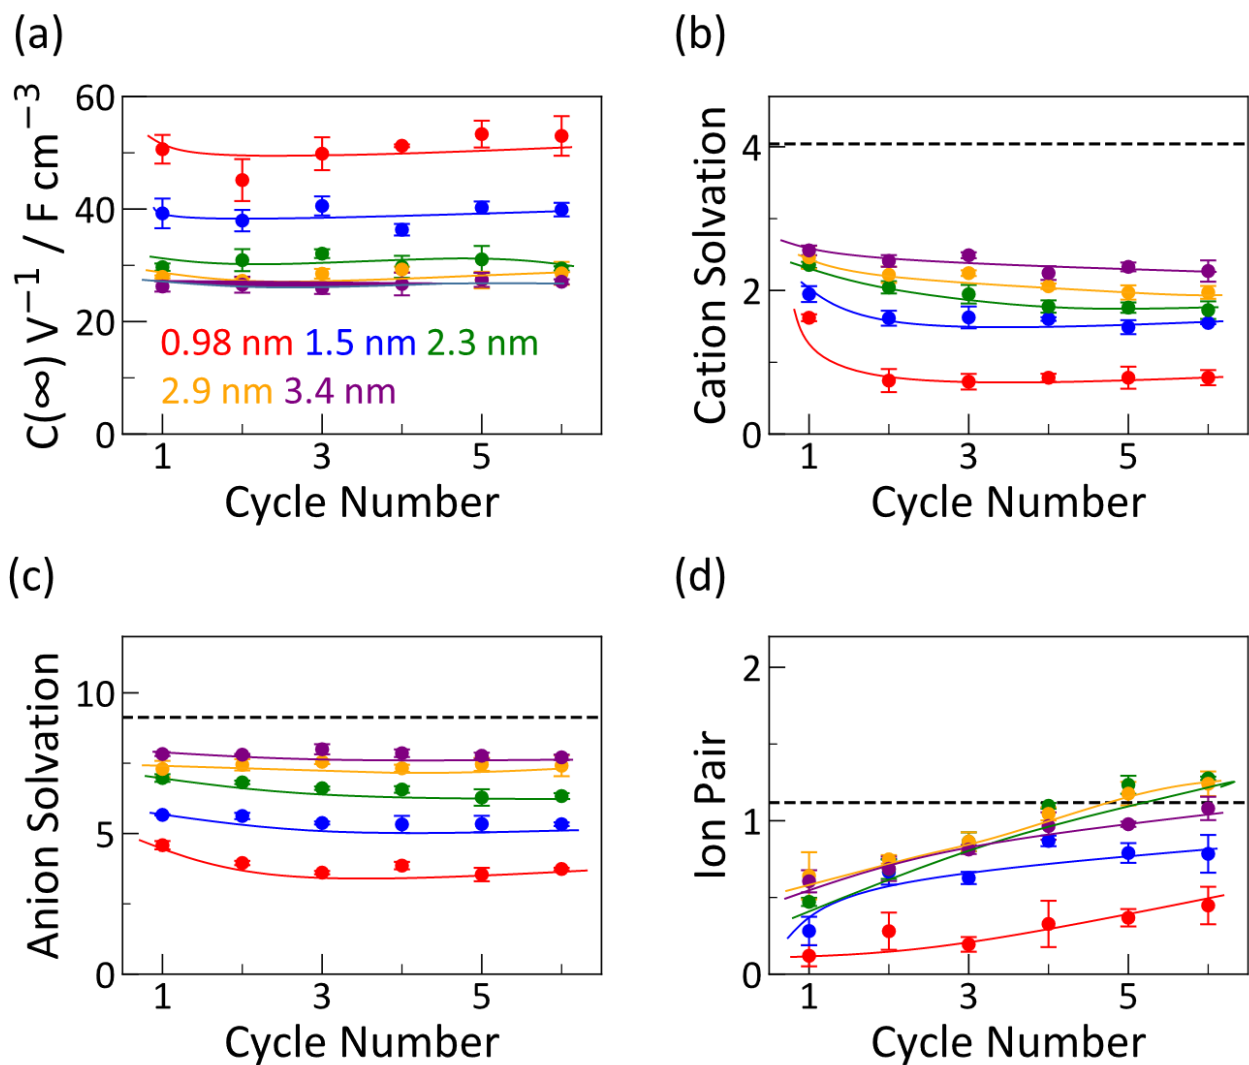

**Figure S11.** Cyclability for capacitance (a), cation solvation (b), anion solvation (c), and ion pair (d) under applying a charge of  $\pm 0.03 e$  in the wedge-shaped pores with the averaged pore size of 0.98, 1.5, 2.3, 2.9, and 3.4 nm. Ion pair and cation and anion solvations were calculated in the pores. Bulk solvation and ion pair numbers are shown in a black dashed line.

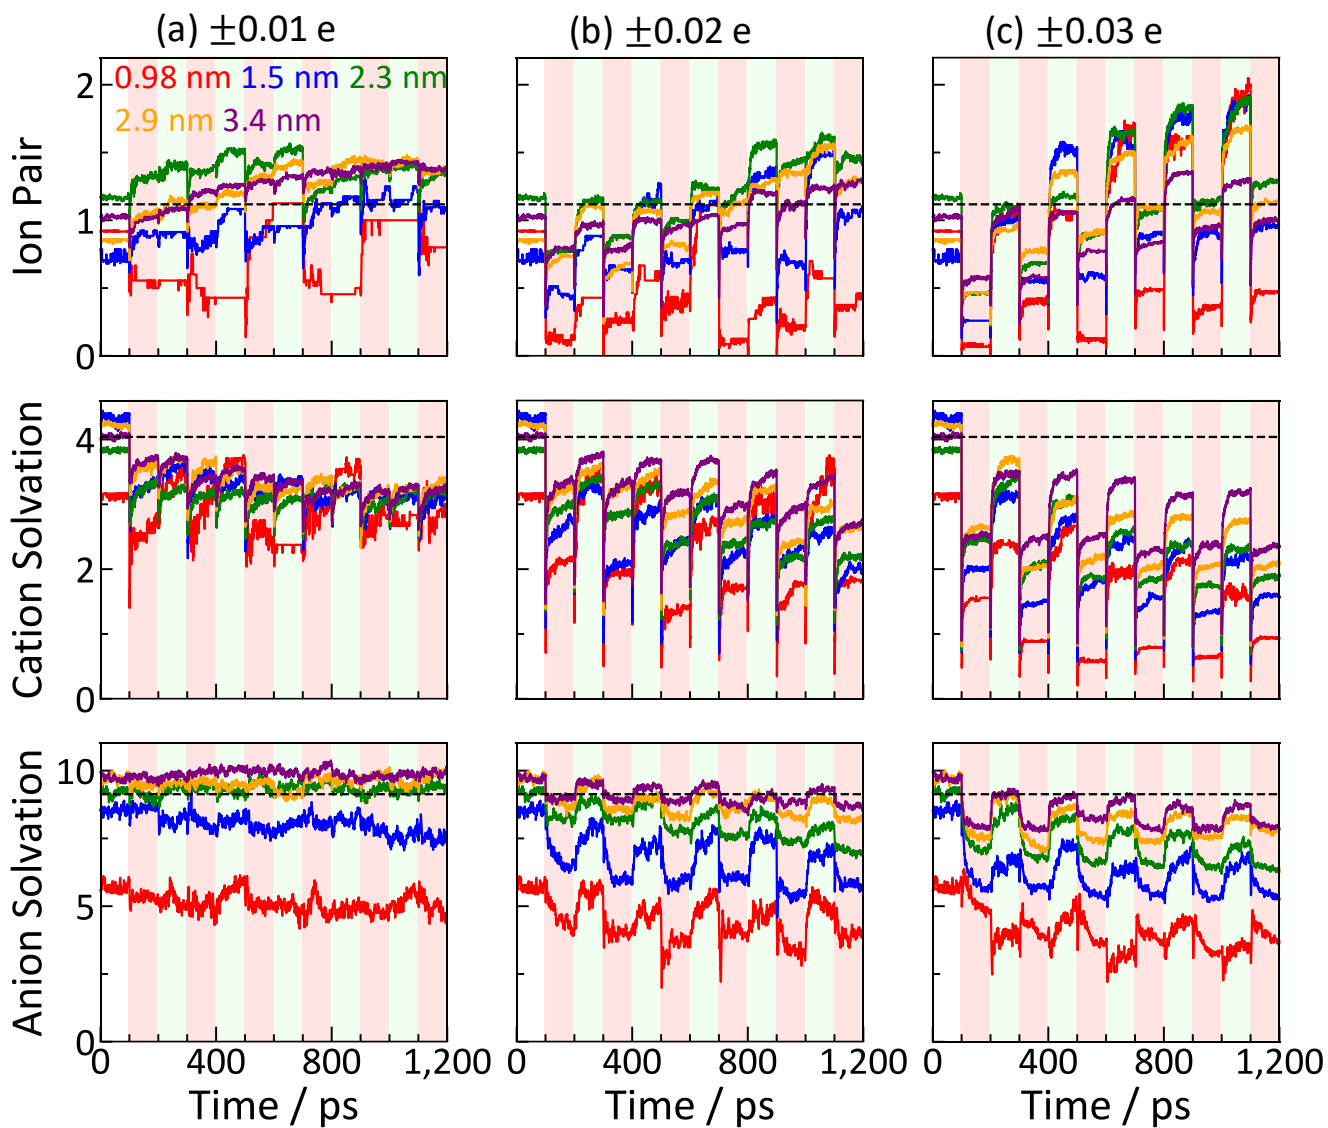

**Figure S12.** Ion pair and cation and anion solvation in the pores applying partial charges of  $\pm 0.01 e$  (a),  $\pm 0.02 e$  (b), and  $\pm 0.03 e$  (c) in the wedge-shaped pores with the averaged pore size of 0.98, 1.5, 2.3, 2.9, and 3.4 nm. Those in bulk were shown in a black dashed line. Red and green shades indicate charging and releasing, respectively.

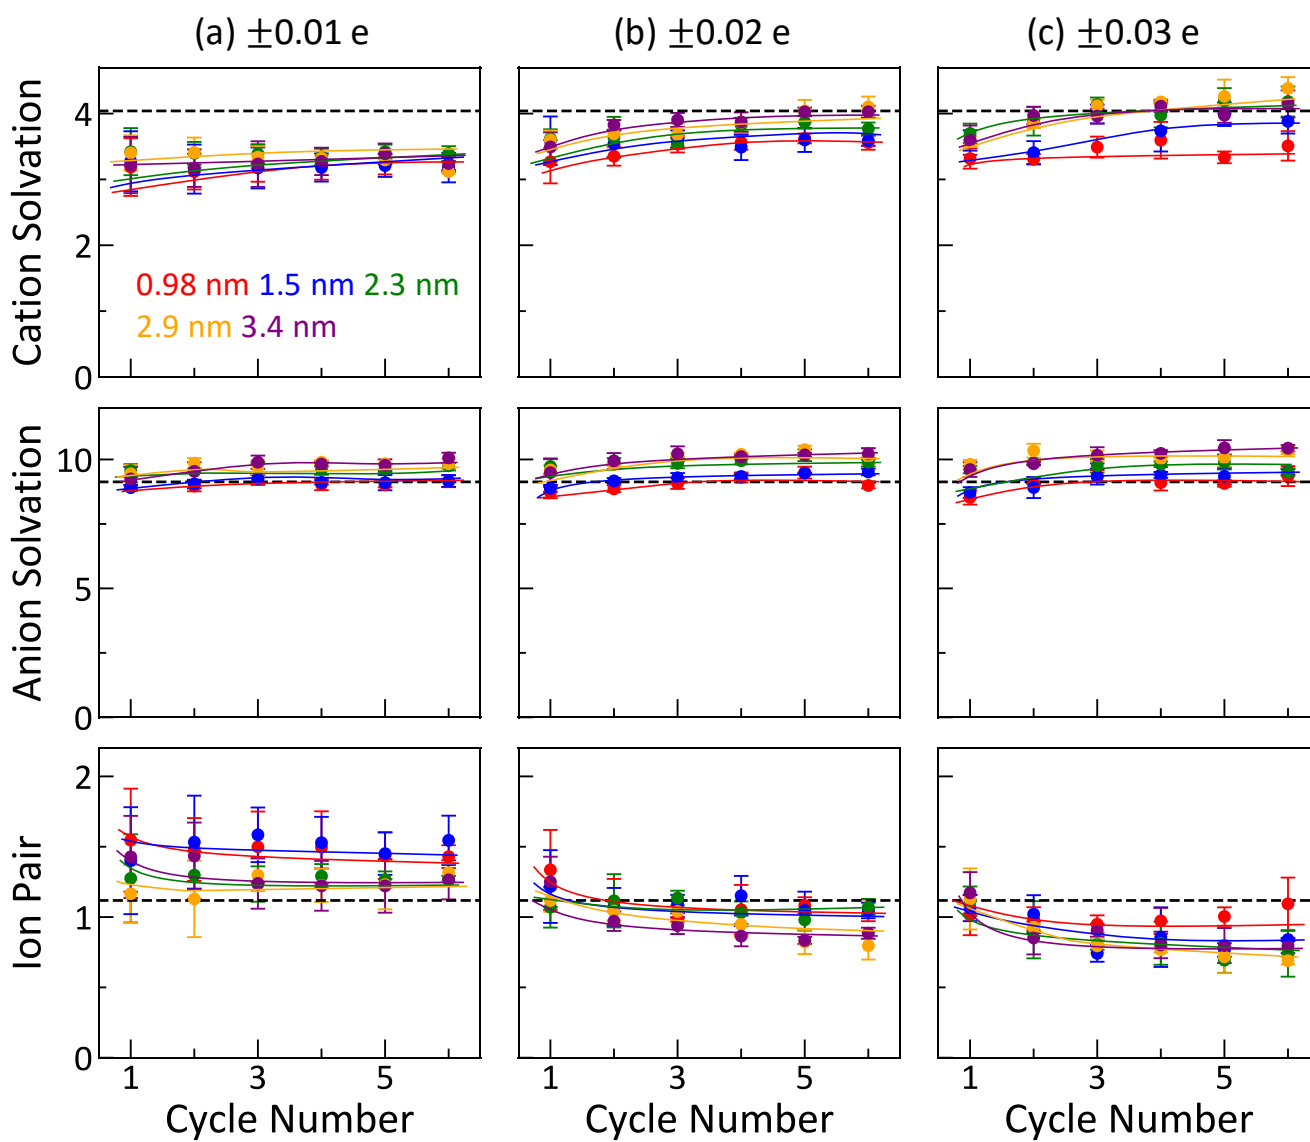

**Figure S13.** Cation and anion solvation and ion pair in inter-electrode space applying partial charges of  $\pm 0.01 e$  (a),  $\pm 0.02 e$  (b), and  $\pm 0.03 e$  (c) in the wedge-shaped pores with the averaged pore size of 0.98, 1.5, 2.3, 2.9, and 3.4 nm.



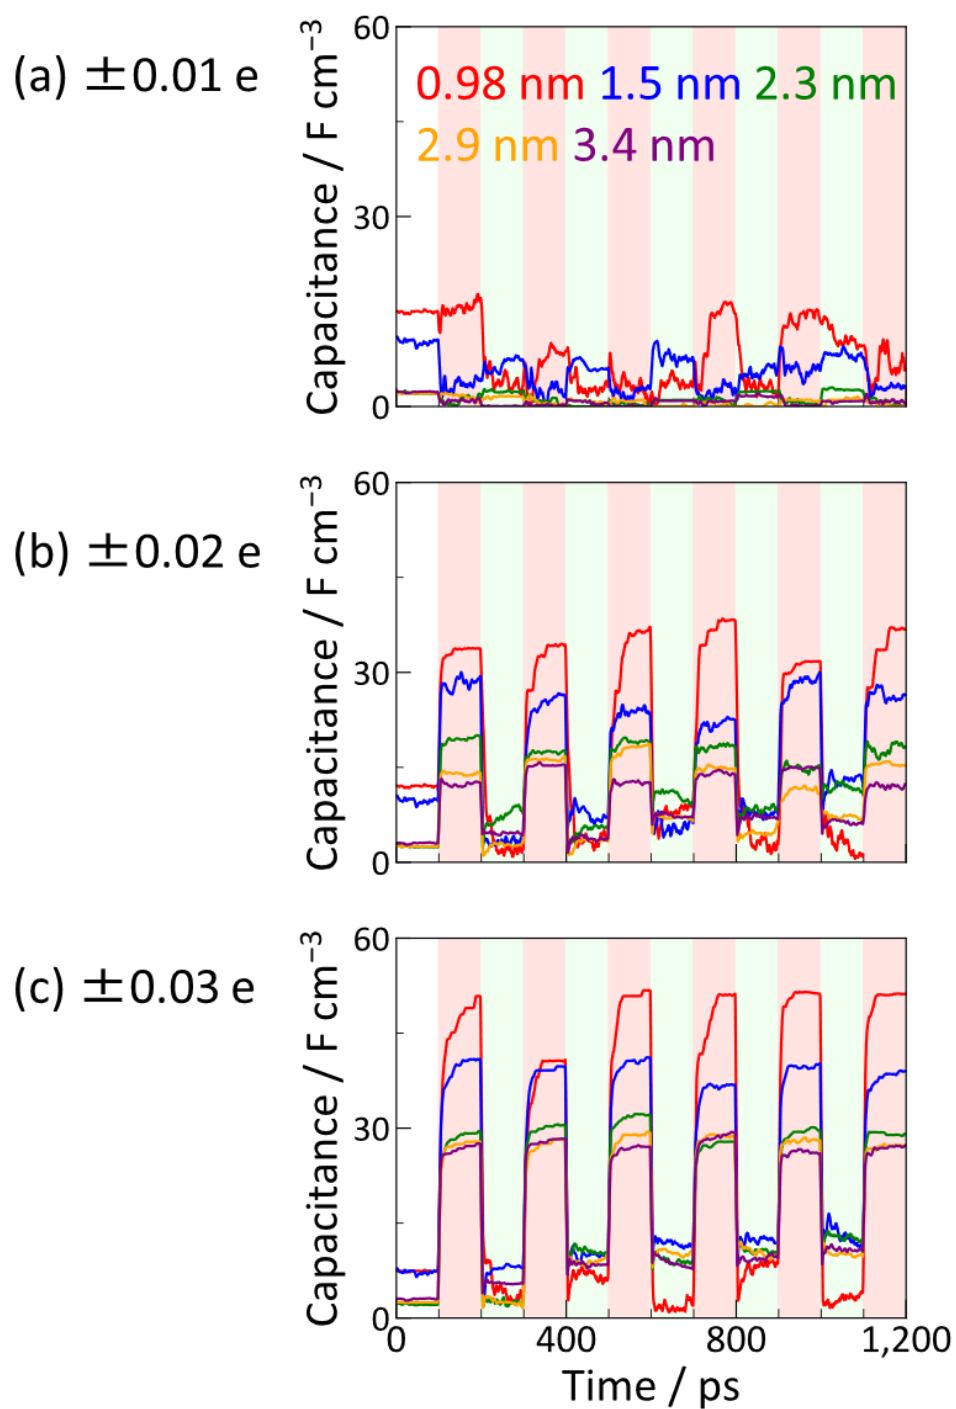

**Figure S14.** Capacitance at a charge of  $\pm 0.01 e$  (a),  $\pm 0.02 e$  (b), and  $\pm 0.03 e$  (c) in the wedge-shaped pores with the averaged pore size of 0.98, 1.5, 2.3, 2.9, and 3.4 nm.

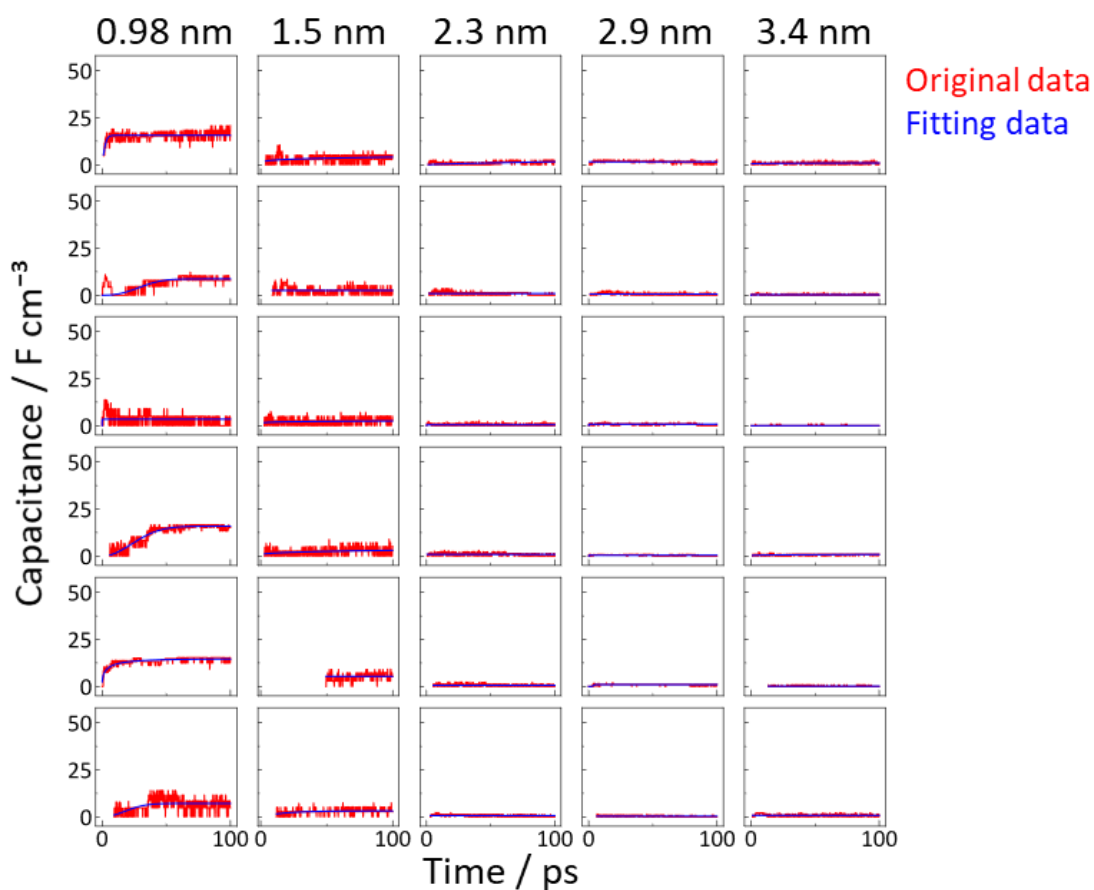

**Figure S15.** Curve fitting results of capacitance change during charging applying partial charges of  $\pm 0.01 e$  in the wedge-shaped pores with the averaged pore size of 0.98, 1.5, 2.3, 2.9, and 3.4 nm. From the top, the results are shown from the first to the fifth charging. Original data and fitting results are shown in red and blue, respectively.

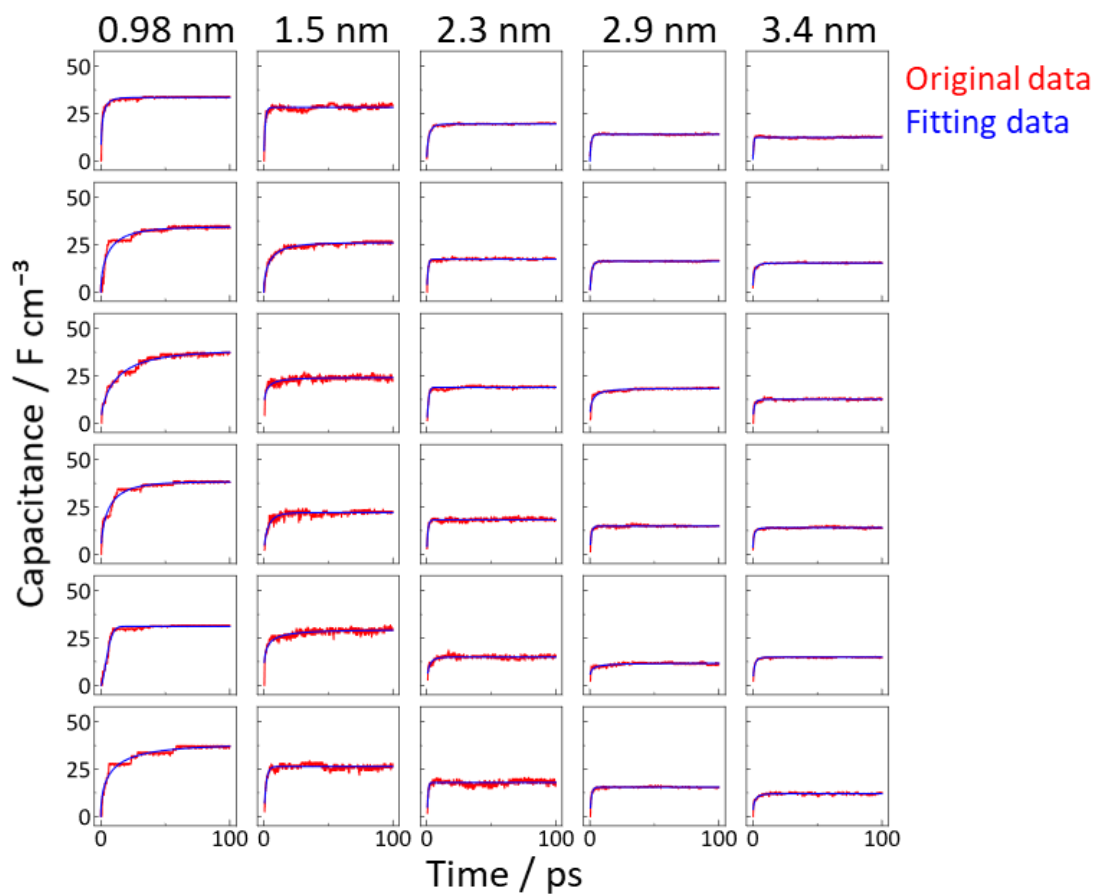

**Figure S16.** Curve fitting results of capacitance change during charging applying partial charges of  $\pm 0.02 e$  in the wedge-shaped pores with the averaged pore size of 0.98, 1.5, 2.3, 2.9, and 3.4 nm. From the top, the results are shown from the first to the fifth charging. Original data and fitting results are shown in red and blue, respectively.

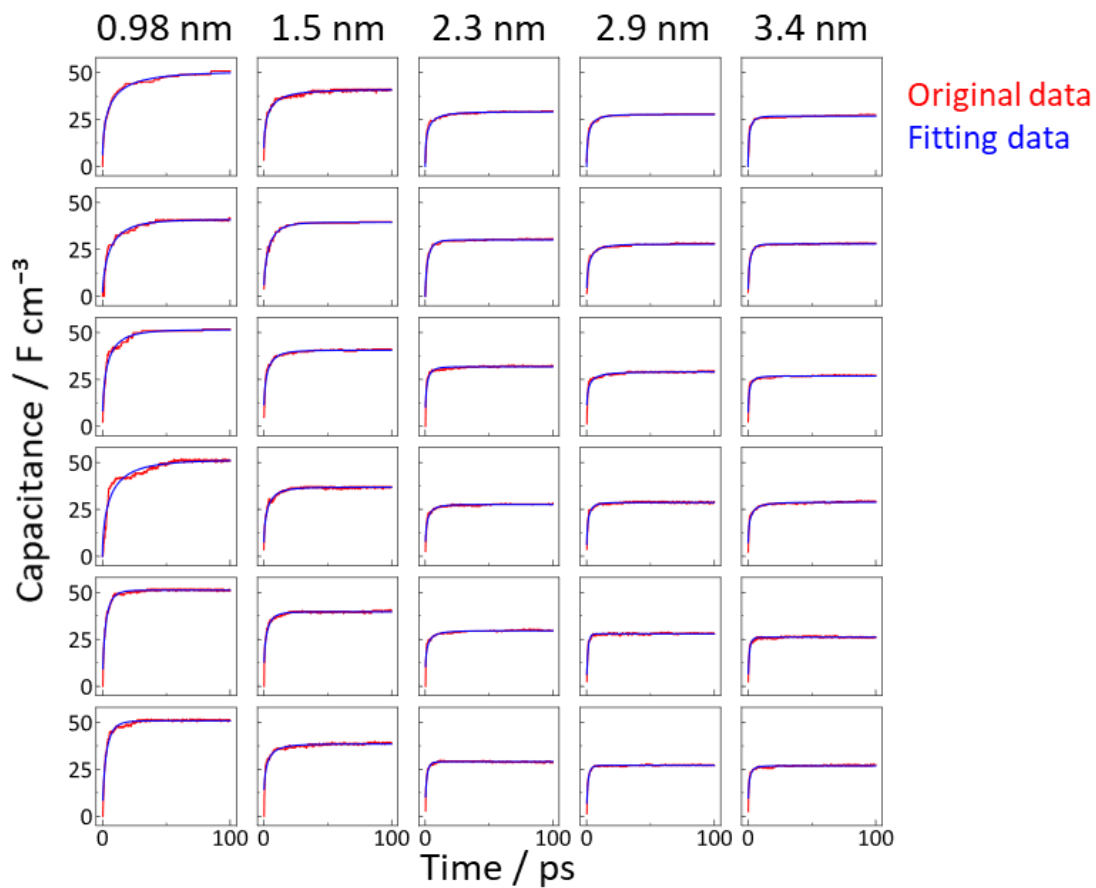

**Figure S17.** Curve fitting results of capacitance change during charging applying partial charges of  $\pm 0.03 e$  in the wedge-shaped pores with the averaged pore size of 0.98, 1.5, 2.3, 2.9, and 3.4 nm. From the top, the results are shown from the first to the fifth charging. Original data and fitting results are shown in red and blue, respectively.

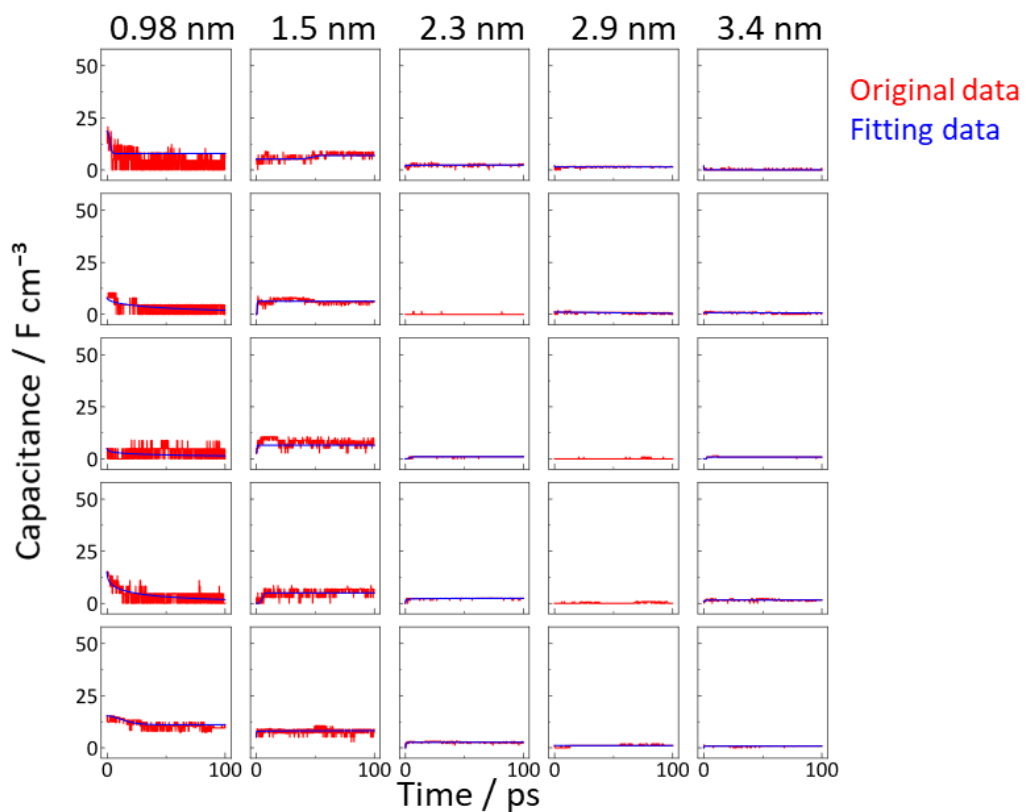

**Figure S18.** Curve fitting results of capacitance change during release, applying partial charges of  $\pm 0.01$  e in the wedge-shaped pores with the averaged pore size of 0.98, 1.5, 2.3, 2.9, and 3.4 nm. From the top, the results are shown from the first to the fourth release. Original data and fitting results are shown in red and blue, respectively.

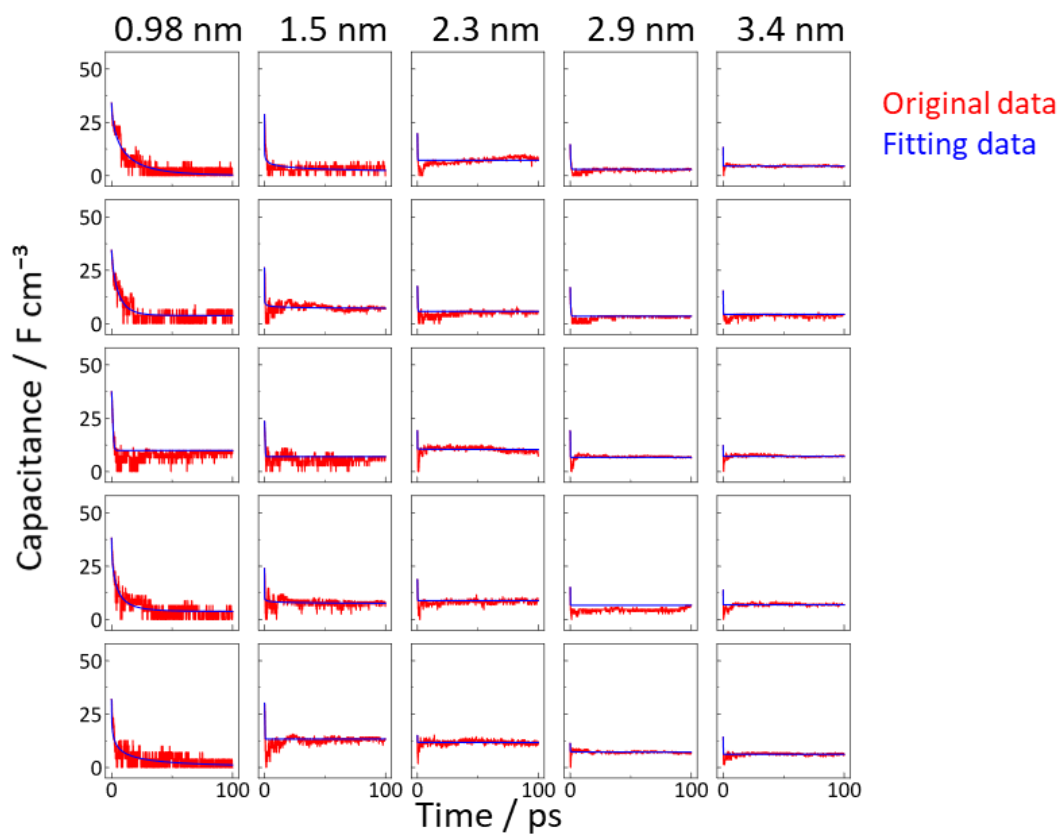

**Figure S19.** Curve fitting results of capacitance change during release, applying partial charges of  $\pm 0.02$  e in the wedge-shaped pores with the averaged pore size of 0.98, 1.5, 2.3, 2.9, and 3.4 nm. From the top, the results are shown from the first to the fourth release. Original data and fitting results are shown in red and blue, respectively.

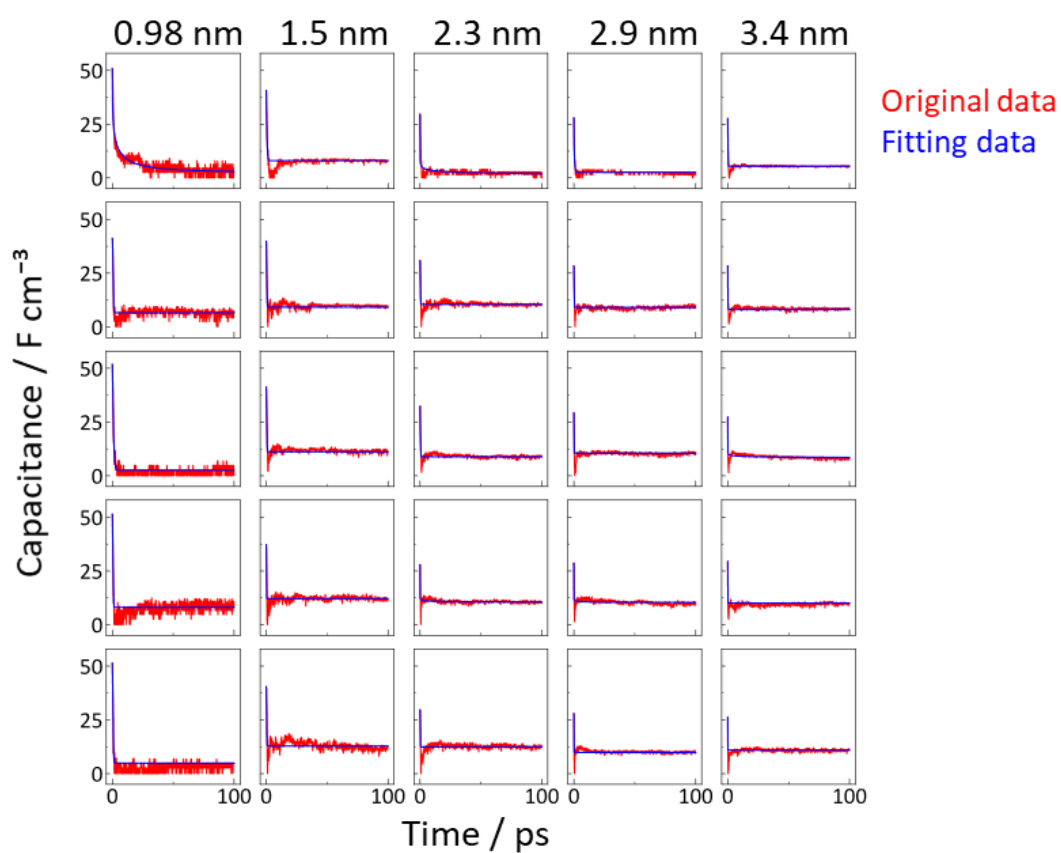

**Figure S20.** Curve fitting results of capacitance change during release, applying partial charges of  $\pm 0.03$  e in the wedge-shaped pores with the averaged pore size of 0.98, 1.5, 2.3, 2.9, and 3.4 nm. From the top, the results are shown from the first to the fourth release. Original data and fitting results are shown in red and blue, respectively.

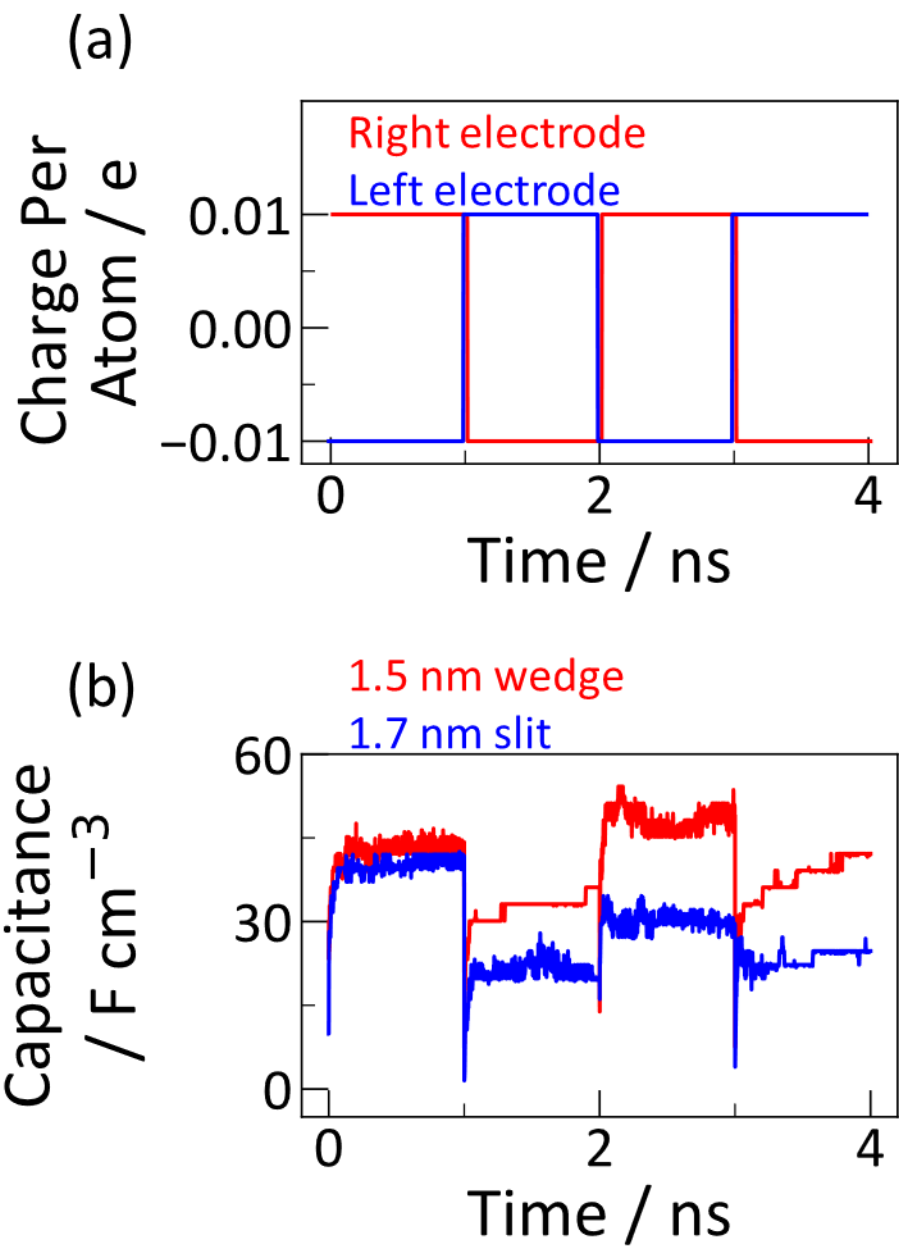

**Figure S21.** (a) Scheme of the partial charges on porous carbons of the right and left porous carbon electrodes with time progress. (b) Capacitance changes in long charge/release cycles at +0.01 e.



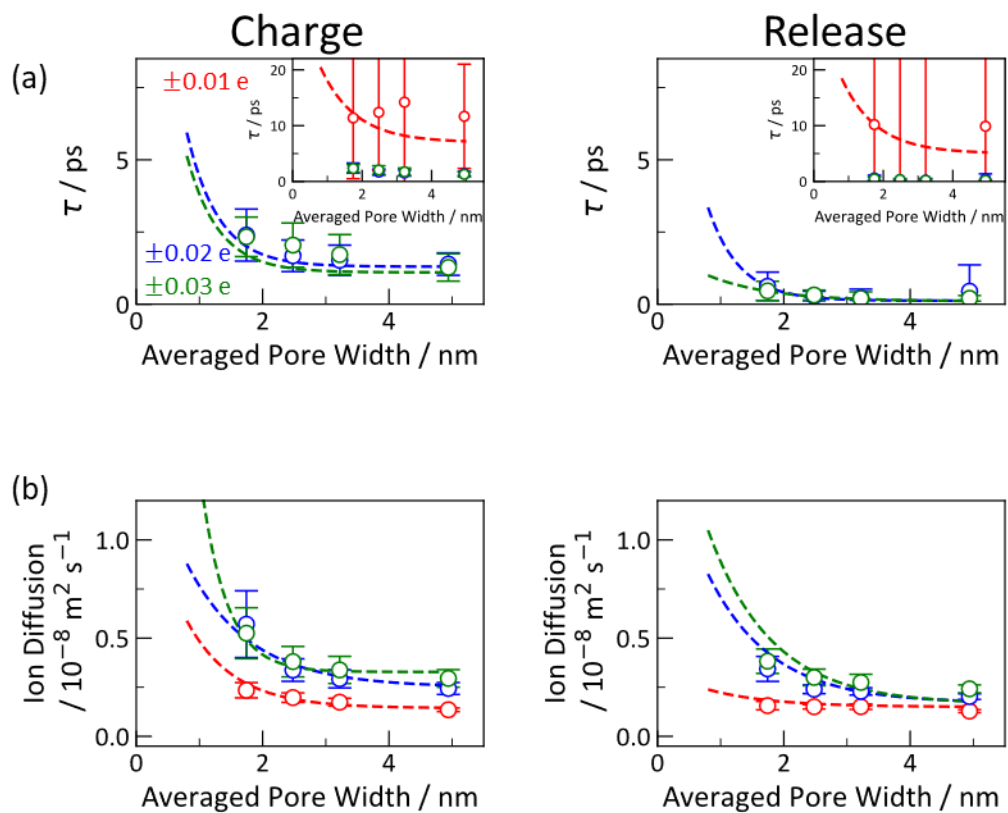

**Figure S22.** Mobility of ions under charge/release in slit pore. Dashed curves represent wedge curves. (a) The relaxation time of capacitances under charge and release. (b) Diffusion coefficient of ions under charge and release.

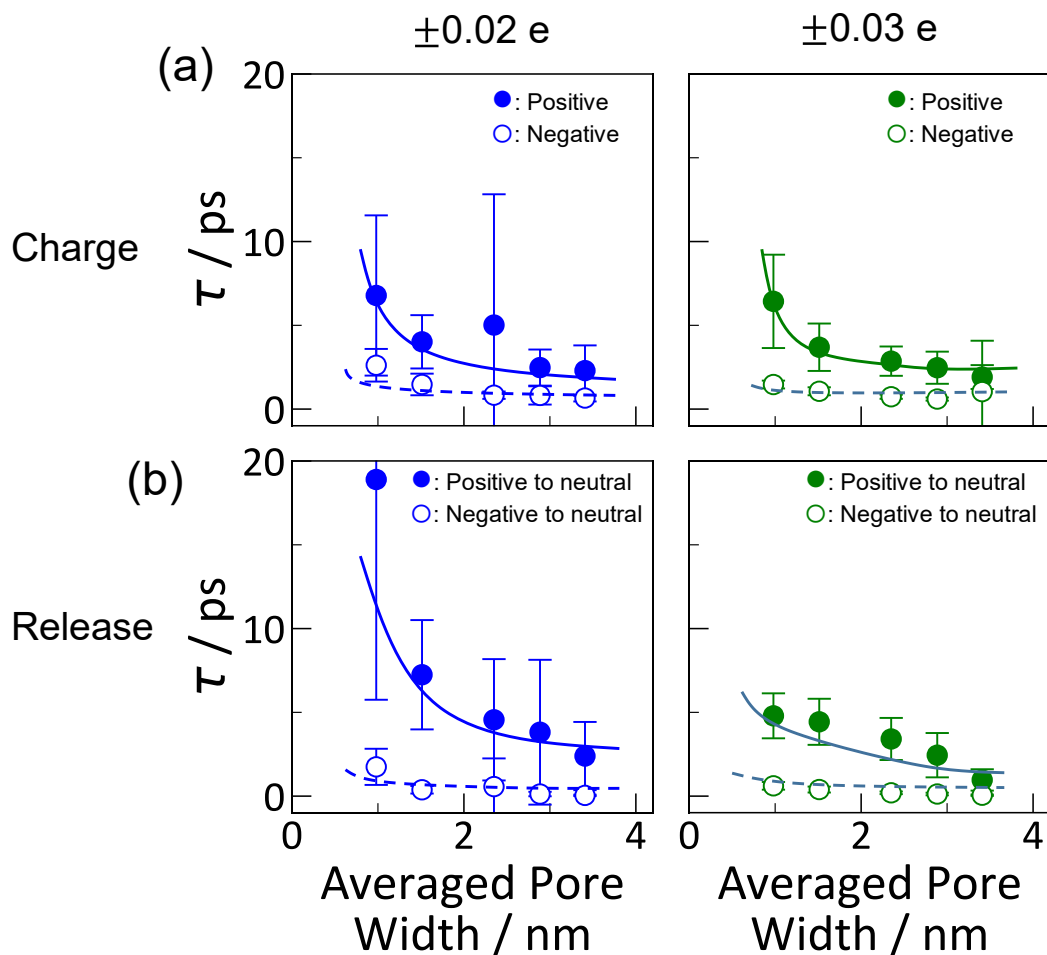

**Figure S23.** Relaxation time calculated using a single pore. (a) Relaxation time under positive charge (filled symbols and solid curves) and negative charge (open symbols and dashed curves). (b) Relaxation time under release positive to neutral represented by filled symbols with solid curves and negative to neutral represented by open symbols with dashed curves.
